# Supplementary material for: 12-Vertex closo-3,1,2-Ruthenadicarbadodecaboranes with Chelate POP-Ligands: Synthesis, X-ray Study and Electrochemical Properties
Source: MDPI journal article supplement (doi:10.3390/inorganics10110206), 2022-11-11
Supplement: s1 [file s1]

# 12-Vertex *closo*-3,1,2-Ruthenadecarbadodecaboranes with Chelate POP-Ligands: Synthesis, X-Ray Study and Electrochemical Properties

Anastasiya M. Zimina <sup>1</sup>, Nikolay V. Somov <sup>1</sup>, Yulia B. Malysheva <sup>1</sup>, Nadezhda A. Knyazeva <sup>1</sup>, Alexander V. Piskunov <sup>1,2</sup> and Ivan D. Grishin <sup>1,\*</sup>

<sup>1</sup> Lobachevsky State University of Nizhny Novgorod, 23 Gagarin Prosp., 603950 Nizhny Novgorod, Russia; asya669pn@gmail.com (A.M.Z.); somov@phys.unn.ru (N.V.S.); yu.b.malysheva@yandex.ru (Y.B.M.); knyaseva2012@yandex.ru (N.A.K.); pial@iomc.ras.ru (A.V.P.)

<sup>2</sup> G.A. Razuvaev Institute of Organometallic Chemistry, Russian Academy of Sciences, 49 Tropinin Str., Nizhny Novgorod 603950, Russia

\* Correspondence: grishin\_i@ichem.unn.ru

**Supplementary Materials:** **Figure S1.** Anisotropic EPR spectra of ruthenacarboranes **2**, **4** and **7** in toluene-CH<sub>2</sub>Cl<sub>2</sub> matrix at 150 K; **Figure S2.** <sup>1</sup>H NMR spectrum of complex **3**. Solvent- CD<sub>2</sub>Cl<sub>2</sub>; **Figure S3.** <sup>11</sup>B{<sup>1</sup>H} NMR spectrum of complex **3**. Solvent- CD<sub>2</sub>Cl<sub>2</sub>; **Figure S4.** <sup>1</sup>H NMR spectrum of complex **5**. Solvent- CD<sub>2</sub>Cl<sub>2</sub>; **Figure S5.** <sup>1</sup>H NMR spectrum of complex **8**. Solvent- CD<sub>2</sub>Cl<sub>2</sub>; **Figure S6.** <sup>11</sup>B{<sup>1</sup>H} NMR spectrum of complex **8**. Solvent- CD<sub>2</sub>Cl<sub>2</sub>.

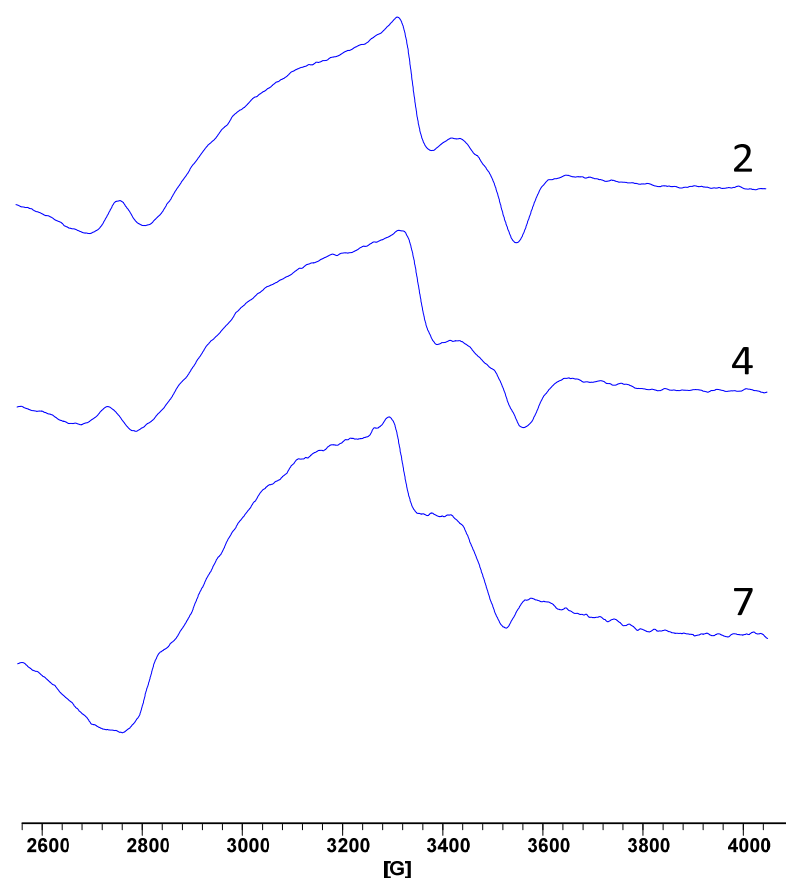

**Figure S1.** Anisotropic EPR spectra of ruthenacarboranes **2**, **4** and **7** in toluene-CH<sub>2</sub>Cl<sub>2</sub> matrix at 150 K

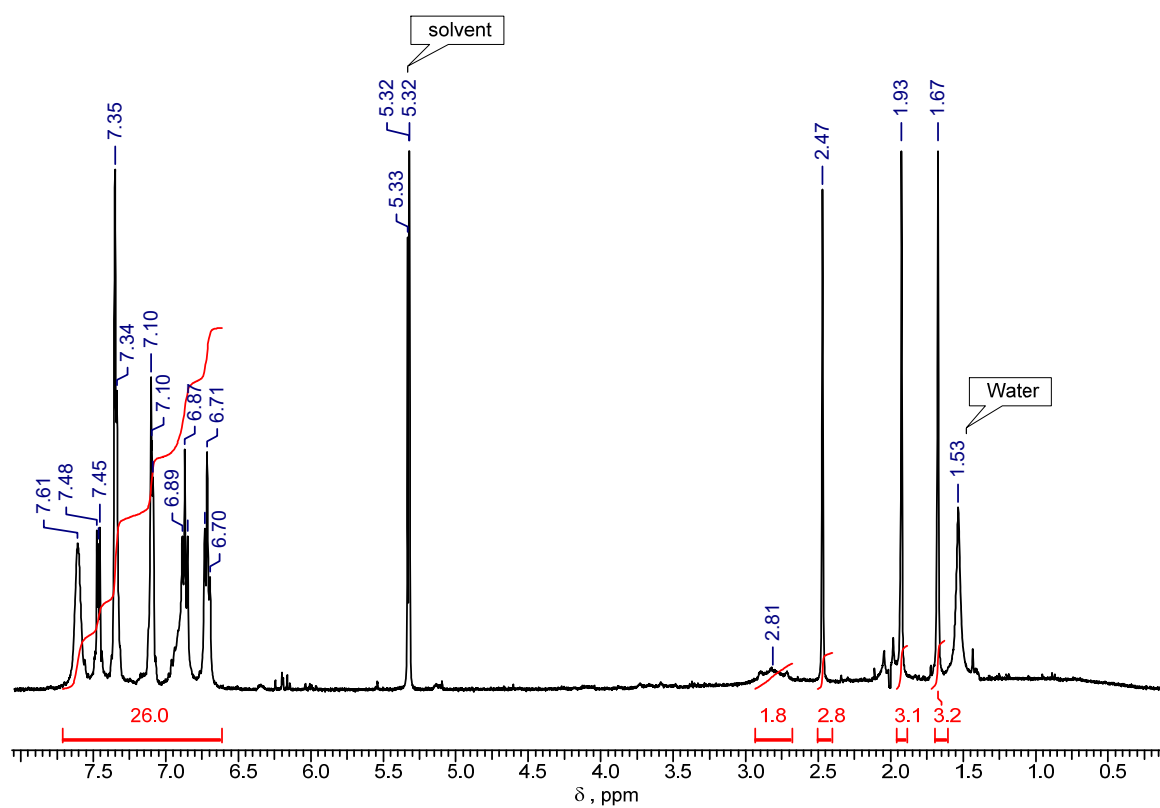

Figure S2.  $^1\text{H}$  NMR spectrum of complex 3. Solvent-  $\text{CD}_2\text{Cl}_2$ .

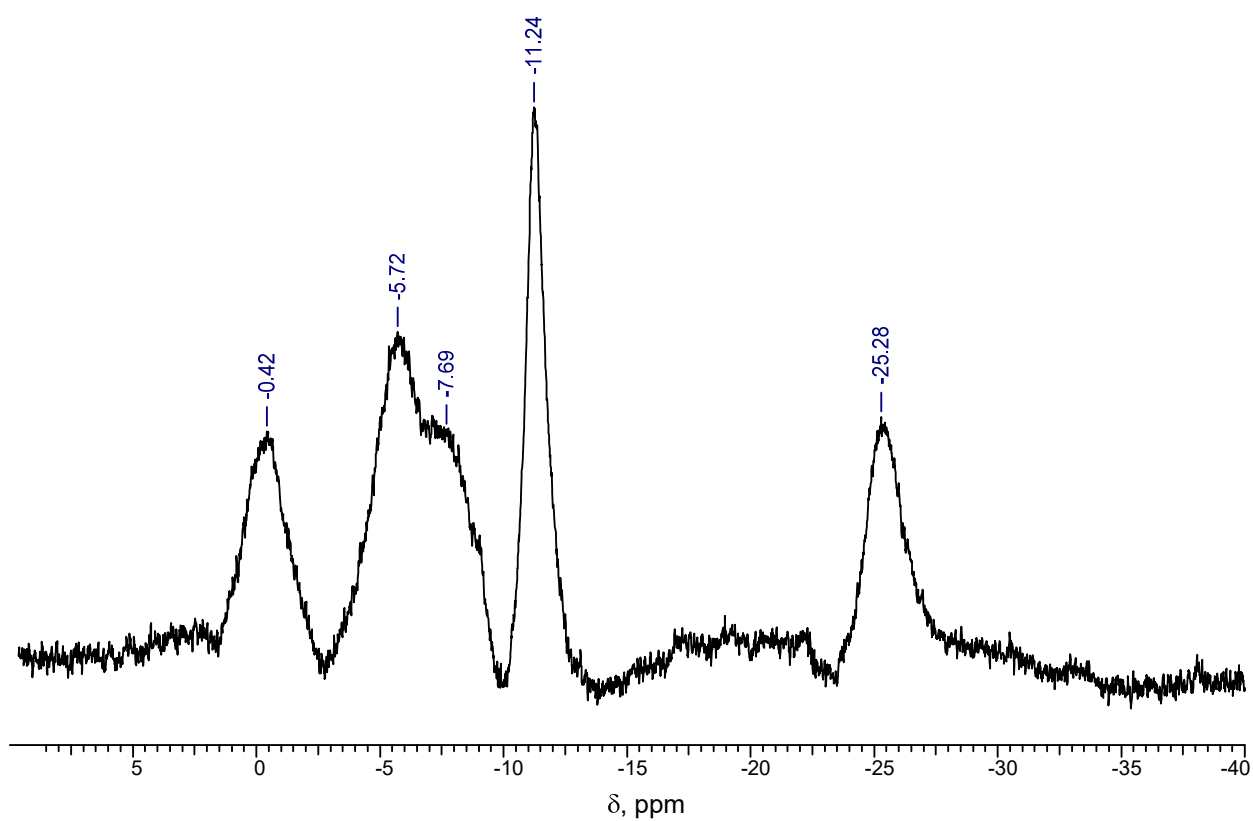

Figure S3.  $^{11}\text{B}\{^1\text{H}\}$  NMR spectrum of complex 3. Solvent-  $\text{CD}_2\text{Cl}_2$ .

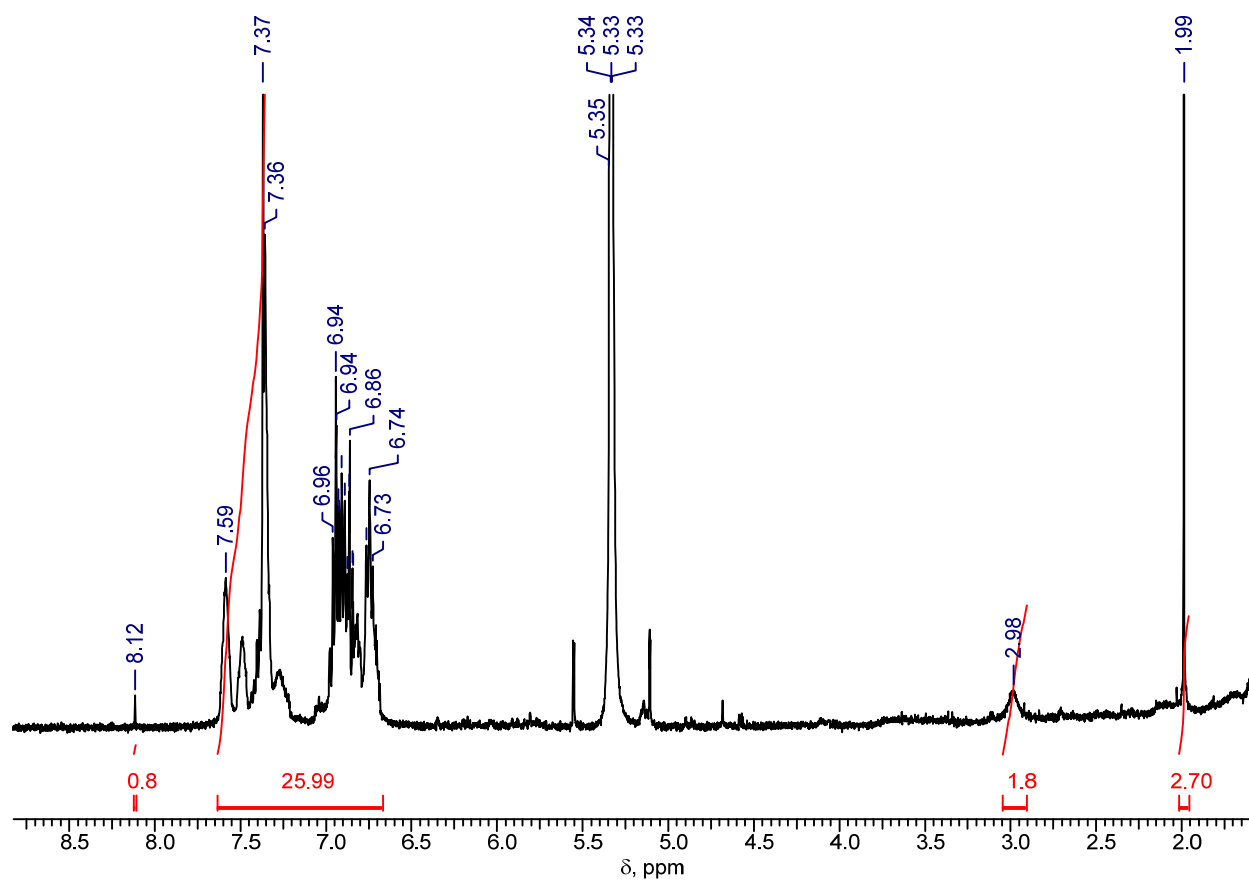

**Figure S4.** <sup>1</sup>H NMR spectrum of complex 5. Solvent- CD<sub>2</sub>Cl<sub>2</sub>.

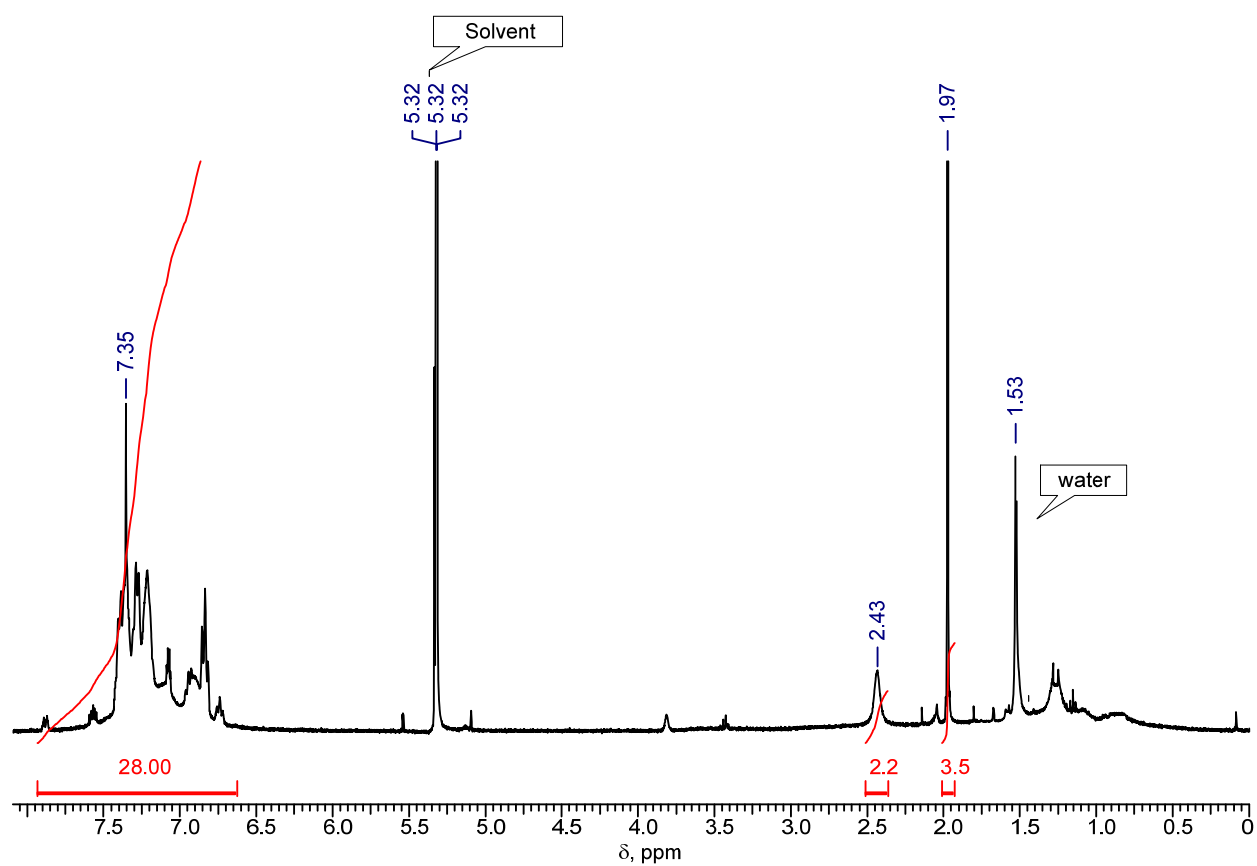

**Figure S5.**  $^1\text{H}$  NMR spectrum of complex **8**. Solvent-  $\text{CD}_2\text{Cl}_2$ .

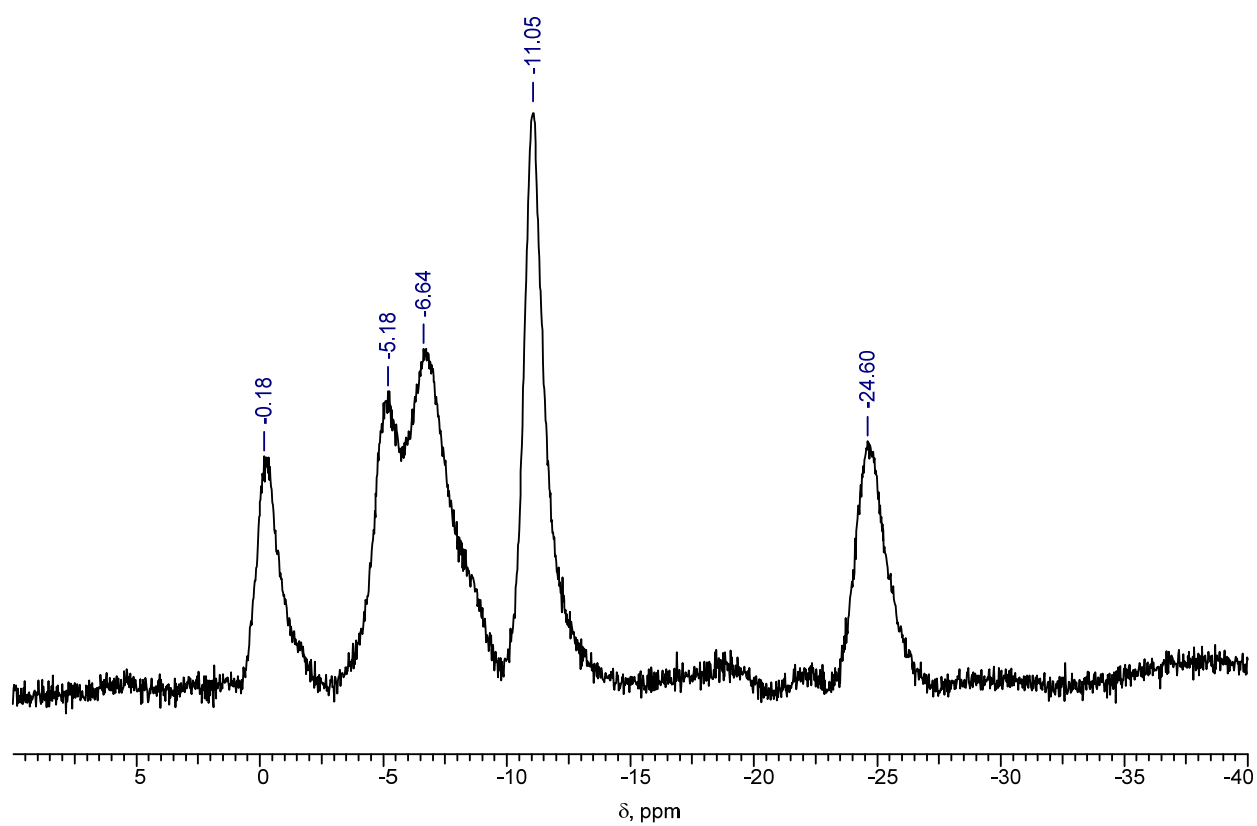

**Figure S6.**  $^{11}\text{B}\{^1\text{H}\}$  NMR spectrum of complex **8**. Solvent-  $\text{CD}_2\text{Cl}_2$ .
